# Supplementary material for: Low-cost, in-liquid measuring system using a novel compact oscillation circuit and quartz-crystal microbalances (QCMs) as a versatile biosensor platform
Source: Copernicus journal article supplement (doi:10.5194/jsss-6-341-2017), 2017-10-09
Supplement: Supplementary file 1 [file jsss-6-341-2017-supplement.zip]

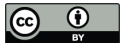

## *Supplement of*

# **Low-cost, in-liquid measuring system using a novel compact oscillation circuit and quartz-crystal microbalances (QCMs) as a versatile biosensor platform**

**Stefan Beißner et al.**

*Correspondence to:* Stefan Beißner ([stefan.beissner@hs-hannover.de](mailto:stefan.beissner@hs-hannover.de)) and Jan-Wilhelm Thies ([j.thies@tu-braunschweig.de](mailto:j.thies@tu-braunschweig.de))

- [jsss-6-341-2017-supplement-title-page.pdf](#)
- [BOM\\_v2.1.3.pdf](#)
- [JSSSmeasurement\\_data\\_final.xlsx](#)
- [quarzoszillator\\_v2.1.3.brd](#)
- [quarzoszillator\\_v2.1.3.sch](#)

The copyright of individual parts of the supplement might differ from the CC BY 3.0 License.
