# Supplementary material for: Low-cost, in-liquid measuring system using a novel compact oscillation circuit and quartz-crystal microbalances (QCMs) as a versatile biosensor platform
Source: Copernicus journal article supplement (doi:10.5194/jsss-6-341-2017), 2017-10-09
Supplement: Supplementary file 2 [file jsss-6-341-2017-supplement.zip]

| Qty                                                           | Value      | Device        | Package      | Parts                                                          | Description                                                                                                       | Best.-Nr. | Distributor |
|---------------------------------------------------------------|------------|---------------|--------------|----------------------------------------------------------------|-------------------------------------------------------------------------------------------------------------------|-----------|-------------|
| <b>Widerstände; SMD-1206</b>                                  |            |               |              |                                                                |                                                                                                                   |           |             |
| 1                                                             | NULL       | R-EU_R1206    | R1206        | JU2                                                            | RESISTOR, European symbol                                                                                         |           |             |
| 1                                                             | 50         | R-EU_R1206    | R1206        | R15                                                            | RESISTOR, European symbol                                                                                         |           |             |
| 1                                                             | 56         | R-EU_R1206    | R1206        | R12                                                            | RESISTOR, European symbol                                                                                         |           |             |
| 8                                                             | 100        | R-EU_R1206    | R1206        | R2, R6, R7, R9, R14, R16, R25, R32                             | RESISTOR, European symbol                                                                                         |           |             |
| 1                                                             | 150        | R-EU_R1206    | R1206        | R1                                                             | RESISTOR, European symbol                                                                                         |           |             |
| 2                                                             | 180        | R-EU_R1206    | R1206        | R19, R27                                                       | RESISTOR, European symbol                                                                                         |           |             |
| 4                                                             | 220        | R-EU_R1206    | R1206        | R13, R21, R23, R24                                             | RESISTOR, European symbol                                                                                         |           |             |
| 1                                                             | 270        | R-EU_R1206    | R1206        | R22                                                            | RESISTOR, European symbol                                                                                         |           |             |
| 1                                                             | 330        | R-EU_R1206    | R1206        | R8                                                             | RESISTOR, European symbol                                                                                         |           |             |
| 1                                                             | 390        | R-EU_R1206    | R1206        | R20                                                            | RESISTOR, European symbol                                                                                         |           |             |
| 1                                                             | 470        | R-EU_R1206    | R1206        | R5                                                             | RESISTOR, European symbol                                                                                         |           |             |
| 5                                                             | 1k         | R-EU_R1206    | R1206        | R3, R10, R18, R26, R28                                         | RESISTOR, European symbol                                                                                         |           |             |
| 2                                                             | 4.7k       | R-EU_R1206    | R1206        | R4, R11                                                        | RESISTOR, European symbol                                                                                         |           |             |
| 5                                                             | 10k        | R-EU_R1206    | R1206        | R29, R30, R31, R33, R41                                        | RESISTOR, European symbol                                                                                         |           |             |
| 1                                                             | 10k linear | POTI          | RK09         | R34                                                            | Drehpotentiometer von ALPS                                                                                        | 1191725   | Farnell     |
| 1                                                             | 20k        | R-EU_R1206    | R1206        | R17                                                            | RESISTOR, European symbol                                                                                         |           |             |
| <b>Kondensatoren; Vielschicht 0805; Elkos radial 2,5 Grid</b> |            |               |              |                                                                |                                                                                                                   |           |             |
| 1                                                             | 22p        | C-EUC0805     | C0805        | C2                                                             | CAPACITOR, European symbol                                                                                        |           |             |
| 1                                                             | 33p        | C-EUC0805     | C0805        | C3 , C7                                                        | CAPACITOR, European symbol                                                                                        |           |             |
| 1                                                             | 100p       | C-EUC0805     | C0805        | C1                                                             | CAPACITOR, European symbol                                                                                        |           |             |
| 2                                                             | 1n         | C-EUC0805     | C0805        | C4, C6                                                         | CAPACITOR, European symbol                                                                                        |           |             |
| 1                                                             | 4.7n       | C-EUC0805     | C0805        | C8                                                             | CAPACITOR, European symbol                                                                                        |           |             |
| 1                                                             | 15n        | C-EUC0805     | C0805        | C9                                                             | CAPACITOR, European symbol                                                                                        |           |             |
| 13                                                            | 100n       | C-EUC0805     | C0805        | C5, C10, C11, C12, C13, C14, C15, C16, C17, C18, C19, C21, C22 | CAPACITOR, European symbol                                                                                        |           |             |
| 6                                                             | 2,2uF      | CPOL-EUE2.5-5 | E2,5-5       | C-V1, C-V2, C-V5, C-V6, C-V7, C-V8                             | POLARIZED CAPACITOR, European symbol                                                                              |           |             |
| 1                                                             | 10uF       | CPOL-EUE2.5-5 | E2,5-5       | C20                                                            | POLARIZED CAPACITOR, European symbol                                                                              |           |             |
| <b>Halbleiter; Dioden; ICs</b>                                |            |               |              |                                                                |                                                                                                                   |           |             |
| 4                                                             | 1N4148     | 1N4148        | DO35-7       | D4, D5, D6, D7                                                 | Standard Kleinsignal-Si-Diode; alternativ 1N914                                                                   |           |             |
| 1                                                             | 7805L      | 7805L         | TO92         | IC1                                                            | Festspannungsregler +5V; z.B. MC78L05ACPG von ON; LM78L05ACZ von TI; LM78L05ACZX von Fairchild; alternativ LP2950 | 1467367   | Farnell     |
| 1                                                             | 7905       | 7905L         | TO92         | IC2                                                            | Festspannungsregler +5V; z.B. MC79L05ACPG von ON; LM79L05ACZ von TI; LM79L05ACZ von Fairchild                     | 1467369   | Farnell     |
| 1                                                             | AD835ARZ   | AD835         | SMD-SO8      | U\$3                                                           | Analog Multiplizierer bis max. 100MHz                                                                             | 1661049   | Farnell     |
| 3                                                             | BAT54      | BAT54         | SOT23        | D1, D2, D3                                                     | Schottky Diodes                                                                                                   | 1081190   | Farnell     |
| 4                                                             | OPA860     | OPA860        | SMD-SO8      | OTA1, OTA2, OTA3, OTA4                                         | Transkonduktanzverstärker                                                                                         | 1180132   | Farnell     |
| 1                                                             | UA741D     | uA741         | SO08         | IC3                                                            | Standard OPV; alternativ TL071, OPA134, AD8036                                                                    | 1106042   | Farnell     |
| <b>Gehäuse</b>                                                |            |               |              |                                                                |                                                                                                                   |           |             |
| 1                                                             | TEKO A2    | TEKO A2       | 58 x 72 x 28 |                                                                | Aluminium-Gehäuse Serie AL-BOX                                                                                    | TEKO A2   | Reichelt    |
